# Supplementary material
Source: publisher figshare collection journal article supplement (https://karger.figshare.com/articles/dataset/_/5123401)
Supplement: Supplementary file 1 [file 1]

**Supplementary Table S1: Minor allele frequencies and effect sizes of causal SNPs used in the simulations**

| MAF <sup>a</sup> | $\beta$ |       |       |                            |       |
|------------------|---------|-------|-------|----------------------------|-------|
|                  | Set 1   | Set 2 | Set 3 | Set 4                      | Set 5 |
| 0.01075          | 0.8     | 0.8   | 2     | 2                          | 0.5   |
| 0.0795           | 0.15    | 0.15  | 0     | 0                          | 0     |
| 0.00075          | 1.6     | 1.6   | 2     | 2 (major causative allele) | 0.5   |
| 0.0085           | 1.6     | 1.6   | 2     | 2 (major causative allele) | 0.5   |
| 0.0015           | 1.6     | -1.6  | 2     | 2 (major causative allele) | 0.5   |
| 0.00075          | 1.6     | -1.6  | 2     | 2 (major causative allele) | 0.5   |
| 0.2455           | 0.15    | 0.15  | 0     | 0                          | 0     |
| 0.004            | -       | -     | -     | -                          | 0.5   |
| 0.00425          | -       | -     | -     | -                          | 0.5   |
| 0.00875          | -       | -     | -     | -                          | 0.5   |
| 0.00075          | -       | -     | -     | -                          | 0.5   |
| 0.00025          | -       | -     | -     | -                          | 0.5   |
| 0.03075          | -       | -     | -     | -                          | 0.5   |
| 0.099            | -       | -     | -     | -                          | 0     |
| 0.03725          | -       | -     | -     | -                          | 0.5   |
| 0.004            | -       | -     | -     | -                          | 0.5   |
| 0.0085           | -       | -     | -     | -                          | 0.5   |
| 5.00E-04         | -       | -     | -     | -                          | 0.5   |
| 0.007            | -       | -     | -     | -                          | 0.5   |
| 0.00025          | -       | -     | -     | -                          | 0.5   |

<sup>a</sup> minor allele frequency;

**Supplementary Table S2. The mean and variance of the percent of variability of a quantitative trait explained by CVs, LCVs, and RVs in the five models<sup>1</sup>.**

| $\rho$     | Model 1 <sup>a</sup> , mean |                           |                           | Model 2 <sup>b</sup> , mean |                           |                           | Model 3 <sup>c</sup> , mean |                           |                           | Model 4 <sup>d</sup> , mean |                           |                           | Model 5 <sup>e</sup> (mean (sd)) |                           |                           |
|------------|-----------------------------|---------------------------|---------------------------|-----------------------------|---------------------------|---------------------------|-----------------------------|---------------------------|---------------------------|-----------------------------|---------------------------|---------------------------|----------------------------------|---------------------------|---------------------------|
|            | (SD)                        |                           |                           | (SD)                        |                           |                           | (SD)                        |                           |                           | (SD)                        |                           |                           | (sd)                             |                           |                           |
|            | CVs                         | LC Vs                     | RVs                       | CVs                         | LC Vs                     | RVs                       | C Vs                        | LC Vs                     | RVs                       | C Vs                        | LC Vs                     | RVs                       | C Vs                             | LC Vs                     | RVs                       |
| <b>0</b>   | 0.01                        | 0.01                      | 0.05                      | 0.01                        | 0.01                      | 0.05                      |                             |                           |                           |                             |                           |                           |                                  |                           |                           |
|            | 1                           | 3                         | 4                         | 1                           | 3                         | 4                         |                             | 0.07                      | 0.08                      |                             | 0.07                      | 0.08                      |                                  | 0.04                      | 0.02                      |
|            | (2×1<br>0 <sup>-7</sup> )   | (4×1<br>0 <sup>-6</sup> ) | (6×1<br>0 <sup>-5</sup> ) | (3×1<br>0 <sup>-7</sup> )   | (4×1<br>0 <sup>-6</sup> ) | (5×1<br>0 <sup>-5</sup> ) | 0                           | (1*1<br>0 <sup>-4</sup> ) | (1×1<br>0 <sup>-4</sup> ) | 0                           | (1*1<br>0 <sup>-4</sup> ) | (1×1<br>0 <sup>-4</sup> ) | 0                                | (5×1<br>0 <sup>-6</sup> ) | (3×1<br>0 <sup>-6</sup> ) |
| <b>0.5</b> | 0.01                        | 0.01                      | 0.05                      | 0.01                        | 0.01                      | 0.05                      |                             |                           |                           |                             |                           |                           |                                  |                           |                           |
|            | 1                           | 3                         | 5                         | 1                           | 3                         | 5                         |                             | 0.07                      | 0.08                      |                             | 0.07                      | 0.08                      |                                  | 0.04                      | 0.02                      |
|            | (2×1<br>0 <sup>-7</sup> )   | (3×1<br>0 <sup>-6</sup> ) | (7×1<br>0 <sup>-5</sup> ) | (2×1<br>0 <sup>-7</sup> )   | (3×1<br>0 <sup>-6</sup> ) | (6×1<br>0 <sup>-5</sup> ) | 0                           | (9*1<br>0 <sup>-5</sup> ) | (1×1<br>0 <sup>-4</sup> ) | 0                           | (9*1<br>0 <sup>-5</sup> ) | (1×1<br>0 <sup>-4</sup> ) | 0                                | (7×1<br>0 <sup>-6</sup> ) | (4×1<br>0 <sup>-6</sup> ) |

<sup>1</sup>CVs: common SNPs (MAFs 5%~50%); LCVs: less common SNPs (MAFs 1% ~5%); RVs: rare SNPs (MAFs < 1%).

**Supplementary Table S3. The type one error rates of two-stage designs at a nominal level of 0.05 when CVs and LCVs are in LD**

| Test | Design            | <i>l</i> |       |      |       |      |       |      |      |       |      |       |      |       |  |
|------|-------------------|----------|-------|------|-------|------|-------|------|------|-------|------|-------|------|-------|--|
|      |                   | .001     | .0025 | .004 | .0055 | .007 | .0085 | .011 | .013 | .0145 | .016 | .0175 | .019 | .0205 |  |
| Sum  | OS <sup>a</sup>   | .047     |       |      |       |      |       |      |      |       |      |       |      |       |  |
|      | TS-E <sup>b</sup> | .056     | .058  | .047 | .049  | .052 | .053  | .048 | .059 | .053  | .050 | .055  | .049 | .054  |  |
| SSU  | OS                | .051     |       |      |       |      |       |      |      |       |      |       |      |       |  |
|      | TS-E              | .055     | .052  | .051 | .052  | .053 | .054  | .053 | .052 | .050  | .052 | .052  | .054 | .052  |  |

<sup>a</sup> OS = one-stage design; <sup>b</sup> TS-E = two-stage design with extreme phenotype sampling.

**Supplementary Table S4: The percent of variability of quantitative trait  $Q_{2-10}$  explained by CVs, LCVs, and RVs within 13 causal genes for GAW17 data**

| Gene          | #(causal SNPs) |      |     | %       |         |         |
|---------------|----------------|------|-----|---------|---------|---------|
|               | CVs            | LCVs | RVs | CVs     | LCVs    | RVs     |
| <i>BCHE</i>   | 0              | 0    | 13  | 0       | 0       | 0.05497 |
| <i>GCKR</i>   | 0              | 1    | 0   | 0       | 0.03319 | 0       |
| <i>INSIG1</i> | 0              | 0    | 3   | 0       | 0       | 0.00225 |
| <i>LPL</i>    | 0              | 1    | 2   | 0       | 0.03687 | 0.0157  |
| <i>PDGFD</i>  | 0              | 0    | 4   | 0       | 0       | 0.06447 |
| <i>PLAT</i>   | 0              | 0    | 8   | 0       | 0       | 0.01211 |
| <i>RARB</i>   | 0              | 0    | 2   | 0       | 0       | 0.02238 |
| <i>SIRT1</i>  | 0              | 0    | 9   | 0       | 0       | 0.03721 |
| <i>SREBF1</i> | 0              | 0    | 10  | 0       | 0       | 0.04033 |
| <i>VLDLR</i>  | 0              | 0    | 8   | 0       | 0       | 0.02357 |
| <i>VNN1</i>   | 1              | 0    | 1   | 0.07382 | 0       | 0.01244 |
| <i>VNN3</i>   | 1              | 2    | 4   | 0.03431 | 0.00261 | 0.00659 |
| <i>VWF</i>    | 0              | 0    | 2   | 0       | 0       | 0.01372 |
